# Supplementary material
Source: Elsevier journal article supplement (https://www.sciencedirect.com/science/article/pii/S0122726220300860)
Supplement: mmc1 [file S0122726220300860:mmc1.pdf]

## Anexo 2. Grupo desarrollador y expertos participantes

### **CONSENSO DE LA ASOCIACIÓN COLOMBIANA DE MEDICINA CRÍTICA Y CUIDADOS INTENSIVOS (AMCI) PARA ATENCIÓN Y MANEJO DEL PACIENTE PEDIÁTRICO CON SOSPECHA O CONFIRMACIÓN DE INFECCIÓN SEVERA POR SARS-CoV-2**

#### **Grupo desarrollador del consenso**

Vanessa Torres Viñas MD. Jefe UCI Pediatría Clínica SOMER, Rionegro Antioquia. Vocal capítulo de pediatría AMCI.

Jaime Fernández-Sarmiento MD. Jefe Posgrado Cuidado Intensivo Pediátrico. Universidad de la Sabana. Director UCI Pediatría Fundación Cardioinfantil-Instituto de Cardiología. Estudiante de Doctorado Ciencias de la Salud – Universidad CES

Víctor Hugo Nieto Estrada MD. Especialista en medicina interna y medicina crítica. Especialista en Epidemiología clínica. Intensivista Los Cobos Medical Center. Docente postgrado Fundación Universitaria Sanitas.

#### **Expertos temáticos**

Jaime Fernández-Sarmiento MD. Jefe Posgrado Cuidado Intensivo Pediátrico. Universidad de la Sabana. Director UCI Pediatría Fundación Cardioinfantil-Instituto de Cardiología. Estudiante de Doctorado Ciencias de la Salud – Universidad CES

Lorena Acevedo Sedano MD. Intensivista Pediatra. Fundación Cardioinfantil-Instituto de Cardiología. Bogotá

María Piedad Sarmiento MD. Intensivista Pediatra. Especialista en Bioética, master en Cuidados Paliativos Pediátricos. Jefe UCI Clínica del Country, Bogotá.

Rosalba Pardo MD. Intensivista Pediatra. Jefe UCI Clínica Infantil Colsubsidio. Profesor Posgrado en Cuidado Intensivo Pediátrico Universidad del Rosario. Bogotá.

Ruben Lasso MD. Intensivista Pediatra. Fundación Valle del Lili, Cali.

Vanessa Torres Viñas MD. Jefe UCI Pediatría Clínica SOMER, Rionegro Antioquia. Vocal capítulo de pediatría AMCI.

Yurika López MD Intensivista Pediatra. Hospital General de Medellín, Clínica Cardiovid y Clínica SOMER Antioquia.

#### **Expertos Participantes**

Byron Piñeres Olave MD. Intensivista Pediatra. Hospital Pablo Tobón Uribe, Clínica Cardiovid, Medellín.

Carolina Tamayo MD. Intensivista Pediatra. Jefe UCI Hospital Pablo Tobón Uribe, Medellín

Eliana Zemanate Zúñiga MD. Intensivista Pediatra. Jefe UCI

Juan Camilo Jaramillo MD. Intensivista Pediatra. Hospital General de Medellín. Miembro La Red Network

Hernando Mulett Hoyos MD. Intensivista Pediatra. Fundación Cardioinfantil, Bogotá.

María Teresa Agudelo MD. Intensivista Pediatra. Fundación Valle del Lili, Cali

Pablo Vásquez-Hoyos.MD MsC. Intensivista Pediatra con maestría en Epidemiología Clínica. Jefe Unidad de Cuidado Intensivo Pediátrico. Hospital San José. Bogotá. Miembro comité ejecutivo LaRed Network.

Rafael Orozco Marín MD. Intensivista Pediatra. Jefe UCI Clínica Porto Azul, Barranquilla.
