# Supplementary material
Source: Elsevier journal article supplement (https://www.sciencedirect.com/science/article/pii/S0122726220300860)
Supplement: mmc2 [file S0122726220300860:mmc2.pdf]

## **Anexo 2. ESTRATEGIAS DE PREVENCIÓN Y CONTROL EN LA INFECCIÓN INTRAHOSPITALARIA POR COVID 19.**

A la luz de los conocimientos actuales, se considera que el COVID 19 se transmite principalmente por las gotas respiratorias de más de 5 micras y por el contacto directo con las secreciones infectadas; y desde luego también podría transmitirse por aerosoles en procedimientos terapéuticos que lo produzcan(1).

En este escenario, las precauciones para el manejo de los pacientes con sospecha de infección por COVID 19 deben incluir las precauciones estándar, precauciones de contacto y precauciones de transmisión por gotas, y en caso que se realice algún procedimiento donde se produzcan aerosoles se agregarán las precauciones de transmisión por vía aérea (2).

La situación se complica si tenemos en cuenta que se ha documentado un alto grado de contaminación ambiental, derivado de gotitas respiratorias y contaminación fecal proveniente de pacientes infectados por COVID 19(2,3).

Los estamentos internacionales para el control de infecciones, recomiendan un paquete de medidas para minimizar la progresión de la infección intrahospitalaria por COVID 19, las cuales comprenden: la higiene de manos, higiene respiratoria, uso de equipos de protección personal según la evaluación del riesgo, desecho seguro de materiales cortopunzantes, manejo adecuado de residuos hospitalarios, esterilización y desinfección de dispositivos médicos, así como la implementación vigorosa de protocolos de limpieza del ambiente hospitalario( 4 ).

El lavado de manos es la piedra angular para evitar las infecciones intrahospitalarias; es una medida sencilla, segura, fácil de implementar y muy eficaz para minimizar el riesgo de contraer el COVID 19. En todos los ámbitos sanitarios de todo el mundo se han implementado gran cantidad de campañas para el fortalecimiento de esta medida, recomendando su realización: previo al contacto del paciente, antes de realizar procedimientos o manipular dispositivos médicos, después de exponerse a fluidos corporales, después del contacto con el paciente y después del contacto con el entorno del paciente. Desafortunadamente la tasa de adherencia a esta estrategia varía entre el 40 y el 90 % en las diferentes latitudes( 4,5).

La higiene respiratoria, constituye un componente muy importante a raíz de las epidemias de síndrome respiratorio agudo severo(SARS), Influenza H1N1 y desde luego COVID 19. Su objetivo es evitar el riesgo de infección por microorganismos que se transmite mediante las gotas. Las medidas recomendadas para tal efecto son: cubrir la nariz y boca al estornudar, realizar higiene de manos después del contacto con secreciones respiratorias, usar pañuelo para contener las secreciones y descartarlo en una bolsa de plástico después de su uso, y realizar higiene de manos después de tener contacto con objetos contaminados (5).

Los equipos de protección personal (**EPP**) son un conjunto de elementos utilizados para proteger al personal sanitario tanto del paciente como de su entorno. En el caso de la prevención de la infección por COVID 19 se recomienda la utilización de los siguientes elementos de protección personal ( 6 ):

- Guantes
- Mascarilla quirúrgica o Respirador N 95(para procedimientos generadores de aerosoles).
- Protección ocular: careta y monogafas.
- Bata de
- Protección o bata antifluido - delantal impermeable.
- Gorro.
- Botas o zapatos cerrados.

#### ***Estrategias de prevención en el servicio de urgencias.***

- Ante un paciente con síntomas respiratorios, se le debe suministrar a la mayor brevedad una mascarilla quirúrgica ( 7 ) .
- Si cumple criterios epidemiológicos de caso sospechoso de COVID 19, se iniciara la pesquisa diagnóstica y se ubicara en una habitación de aislamiento; el acudiente del paciente también debe portar una mascarilla quirúrgica(7,8).
- Los pacientes que presenten deterioro clínico progresivo, en los cuales se sospeche que van a requerir procedimientos que generen aerosoles, se ubicaran (idealmente) en una habitación con presión negativa. Si no hay disponibilidad de estas, se atenderá en una habitación individual con buena ventilación, manteniendo la puerta cerrada( 8).
- Estas zonas contarán con dispensadores de alcohol glicerinado, toallas desechables y contenedores de residuos con tapas de pedal, facilitando la higiene de manos e higiene respiratoria (8).
- El personal de enfermería realizará la instrucción y educación sobre las medidas de bioseguridad, al paciente y sus familiares (8).

#### ***Estrategias de prevención en el servicio de hospitalización .***

- Los Pediatras del servicio de urgencias llenarán las fichas de reporte obligatorio de caso sospechoso de COVID 19 ,se tomarán las muestras para estudio microbiológico y avisarán al Pediatra encargado del servicio de hospitalización, para optimizar los EPP, en todo el equipo(8,9).
- Los casos COVID 19, probables o confirmados se hospitalizarán en habitaciones individuales, con baño, idealmente con buena ventilación, siguiendo un estricto protocolo aislamiento de contacto y gotas (8,9).

- Durante el traslado a la habitación, el paciente y el personal médico y paramédico portaran mascarilla quirúrgica. La camilla del paciente se cubrirá con una sábana desechable, que se eliminara una vez utilizada, como residuo tipo III( 9).
- En lo posible se limitaran los desplazamientos del paciente; las visitas serán restringidas y se mantendrán las precauciones de aislamiento requeridas( 9).

### ***Estrategias de prevención en la Unidad de Cuidado Intensivo.***

- El traslado del paciente debe realizarse siguiendo una ruta preestablecida, evitando al máximo el contacto persona a persona. Cuando el paciente logre mantener una respiración espontánea, siempre debe llevar colocada una mascarilla quirúrgica durante todo el recorrido hospitalario (9,10).
- Desde el momento que se detecta un caso sospechoso o probable, el personal expuesto debe ser el mínimo imprescindible, y estar provisto de el equipo de protección personal(EPP).Este equipo se compone de una mascarilla quirúrgica, guantes, gafas protectoras, gorro, batas y unas polainas desechables. En caso de requerir realización de procedimientos con producción de aerosoles, es imperativo la protección de la vía aérea con respirador N95(10).
- Los casos sospechosos o probables deben ser hospitalizados en cubículos individuales, idealmente con presión negativa y recambios; o en su defecto en un cubículo individual, en el cual se garantice una buena ventilación(10).
- Durante su ingreso se minimizará el traslado del paciente, realizando los exámenes radiológicos del caso, mediante equipos portátiles (10).
- Se implementará un estricto protocolo de aislamiento de contacto y gotas.
- Dado el alto riesgo de contaminación del personal sanitario durante la realización de procedimientos que generan aerosoles(micronebulizaciones, inducción de esputo, broncoscopia e intubación orotraqueal).Se recomienda evaluar la pertinencia de estos procedimientos, considerar el riesgo beneficio y utilizar todos los EPP (11).
- Es conveniente utilizar fuentes secas de oxígeno (rechazar sistemas de humidificación del oxígeno) para evitar la producción de gotas. Cuando sea preciso la utilización de una cánula nasal de alto flujo, es recomendable que el paciente lleve una mascarilla quirúrgica. De igual manera se desaconseja la administración de broncodilatadores micro nebulizados; cuando sea imprescindible administrar medicación endo

bronquial, se utilizará inhalador de dosis medida mediante espaciadores(11).

- El personal sanitario planificará sus tareas y permanecerá en la habitación el tiempo mínimo que sea requerido. En lo posible se mantendrá a más de 2 metros del paciente, e idealmente se llevará un registro de los profesionales que han permanecido en contacto con el paciente(11).
- La ventilación no invasiva tiene un mayor riesgo de contaminación por la generación de aerosoles. Ante el deterioro de la mecánica respiratoria, se debe considerar el apoyo ventilatorio invasivo precoz (11).

### ***Bibliografía.***

1.Ong SWX, Tan YK, Chia PY, Lee TH, Ng OT, Wong MSY, Marimuthu K. Air, Surface Environmental, and Personal Protective Equipment Contamination by Severe Acute Respiratory Syndrome Coronavirus 2 (SARS-CoV-2) From a Symptomatic Patient. JAMA.2020 Mar 4. doi: 10.1001/jama.2020.3227. [Epub ahead of print]

2.Van Doremalen N, Bushmaker T, Morris DH, Holbrook MG, Gamble A, Williamson BN,Tamin A, Harcourt JL, Thornburg NJ, Gerber SI, Lloyd-Smith JO, de Wit E, Munster VJ. Aerosol and Surface Stability of SARS-CoV-2 as Compared with SARS-CoV-1. N Engl J Med. 2020 Apr 16;382(16):1564-1567

3.Chan JF, Yuan S, Kok KH, To KK, Chu H, Yang J, Xing F, Liu J, Yip CC, Poon RW, Tsoi HW, Lo SK, Chan KH, Poon VK, Chan WM, Ip JD, Cai JP, Cheng VC, Chen H, Hui CK, Yuen KY. A familial cluster of pneumonia associated with the 2019 novel coronavirus indicating person-to-person transmission: a study of a family cluster. Lancet. 2020 Feb 15;395(10223):514-523.

4. Centers for Disease Control Prevention. Sequence for putting on and remove personal protective equipment (PPE). 14. European Centre for Disease Prevention and Control (ECDC). Guidance for wearing and removing personal protective equipment in healthcare settings for the the care of patients Target audience Suggested minimal PPE set. 2020; (February):1–13. [Citado 17 de abril de 2020]. Recuperado a partir de: <https://www.ecdc.europa.eu/en/publications-data/guidance-wearing-and-removing-personal-protective-equipment-healthcare-settings>

5.Offeddu V, Yung CF, Low MSF, Tam CC. Efectividad de mascarillas y respiradores Contra las infecciones respiratorias en trabajadores de la salud: una revisión sistemática y Metanálisis. Clin Infect Dis. 13 de noviembre de 2017; 65 (11): 1934-1942.

6. Centers for Disease Control and Prevention. Safe use of personal protective equipment in the treatment of infectious diseases of high consequence; Diciembre 2014; [Citado 17 de abril de 2020]. Recuperado a partir de: <https://www.ecdc.europa.eu/en/publications-data/safe-use-personal-protective-equipment-treatment-infectious-diseases-high>.

7. World Health Organization. Rational use of personal protective equipment for coronavirus disease 2019 (COVID-19). 19 de marzo de 2020. [Citado 17 de abril de 2020]. Recuperado a partir de: <https://apps.who.int/iris/handle/10665/331498>.
8. Radonovich LJ Jr, Simberkoff MS, Bessesen MT, Brown AC, Cummings DAT, Gaydos CA, et al. Respirators vs Medical Masks for Preventing Influenza Among Health Care Personnel: A Randomized Clinical Trial. JAMA. 2019 Sep 3;322(9):824-833.
9. Siegel JD, Rhinehart E, Jackson M, Chiarello L; Health Care Infection Control Practices Advisory Committee. 2007 Guideline for Isolation Precautions: Preventing Transmission of Infectious Agents in Health Care Settings. Am J InfectControl. 2007 Dec;35(10 Suppl 2):S65-164.
- 10 .European Centre for Disease Prevention and Control. Personal protective equipment (PPE) needs in healthcare settings for the care of patients with suspected or confirmed 2019-nCoV. Stockholm, ECDC, February 2020; [Citado 17 de abril de 2020]. Recuperado a partir de: <https://www.ecdc.europa.eu/en/publications-data/personal-protective-equipment-ppe-needs-healthcare-settings-care-patients>
11. Wax RS, Christian MD. Practical recommendations for critical care and anesthesiology teams caring for novel coronavirus (2019-nCoV) patients. Can J Anaesth. 2020 Feb 12. doi: 10.1007/s12630-020-01591-x. [Epub ahead of print].

## Recomendaciones de EPP para personal de salud según el área de atención para COVID-19. Consenso IETS-ACIN

| Área                                                                                           | Trabajadores de la salud o pacientes | Actividad                                                                   | Tipo de EPP o actividad                                                                                                                                                                                      |
|------------------------------------------------------------------------------------------------|--------------------------------------|-----------------------------------------------------------------------------|--------------------------------------------------------------------------------------------------------------------------------------------------------------------------------------------------------------|
| Urgencias, Hospitalización, Unidades de Cuidado Intensivo, Salas de cirugía, Consulta externa. | Trabajador de la salud               | Contacto directo con el paciente en procedimientos que no generan aerosoles | Mascarilla quirúrgica<br>Visor, careta o monogafas.<br>Bata manga larga anti fluido.<br>Guantes no estériles.<br>Vestido quirúrgico debajo de la bata que se retira al final del turno<br>Opcional:<br>Gorro |
|                                                                                                |                                      | Contacto directo con el paciente en procedimientos que generan aerosoles    | Respirador N95<br>Visor, careta o monogafas.<br>Bata manga larga anti fluido.<br>Guantes no estériles.<br>Vestido quirúrgico debajo de la bata que se retira al final del turno<br>Opcional:<br>Gorro        |
|                                                                                                |                                      | Procedimiento quirúrgico                                                    | Respirador N95<br>Visor, careta o monogafas.<br>Bata manga larga anti fluido.<br>Guantes estériles.<br>Vestido quirúrgico debajo de la bata que se retira al final del turno<br>Gorro<br>Polainas            |
|                                                                                                | Personal de limpieza                 | Entrar a la habitación                                                      | Mascarilla quirúrgica<br>Bata manga larga anti fluido<br>Guantes de caucho<br>Monogafas de protección personal para material orgánico o químico<br>Botas o zapato cerrado                                    |
|                                                                                                | Acompañante permanente               | Entrar a la habitación                                                      | Mascarilla quirúrgica<br>Bata<br>Guantes                                                                                                                                                                     |
| Urgencias, Hospitalización, Salas de cirugía, consulta externa                                 | Paciente                             |                                                                             | Colocar mascarilla quirúrgica si es tolerada por el paciente.                                                                                                                                                |

Adaptado de: Rational use of personal protective equipment for coronavirus disease 2019 (COVID-19). Interim guidance 27 February 2020. World Health Organization. \*Trabajador de la salud: persona que con motivo de su actividad atienda o deba estar en contacto con el paciente
